# Supplementary material
Source: Springer Nature journal article supplement (https://www.springermedizin.de/resource/supplementary/13045_2014_394_MOESM2_ESM.pdf/9661278)

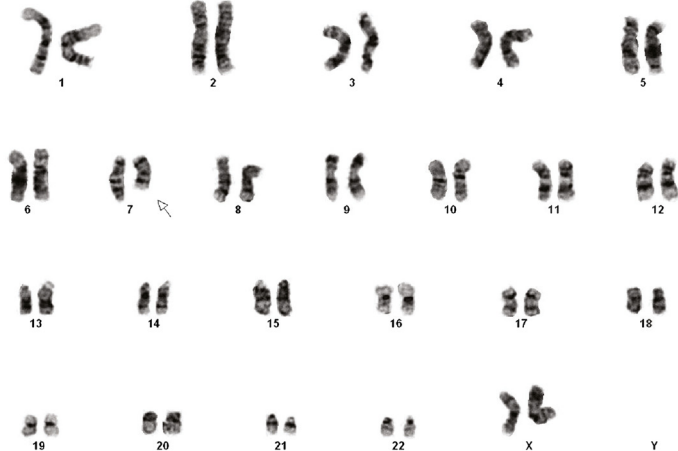

A

Thr358Lys Leu359Val

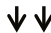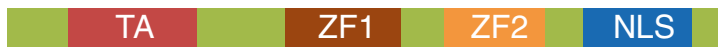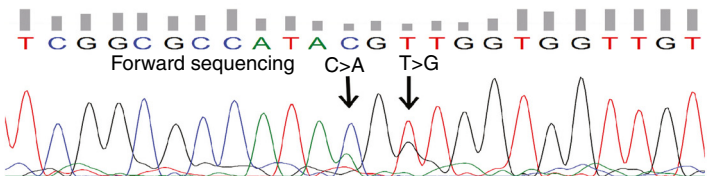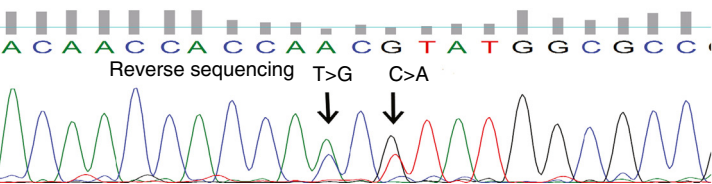

B

Supplement: MOESM2 [file 9661278]
